# Supplementary material for: Development of a multi-residue method for 58 pesticides in soil using QuEChERS and gas chromatography-tandem mass spectrometry
Source: Royal Society of Chemistry journal article supplement (doi:10.1039/c6ay00337k), 2016-01-01
Supplement: c6ay00337k1.pdf [file c6ay00337k1.pdf]

## Supplementary Information

### Development of a multi-residue method for 58 pesticides in soil using QuEChERS and gas chromatography-tandem mass spectrometry

Yong Yu <sup>1,2</sup>, Xiaowei Liu <sup>1,2</sup>, Zeying He <sup>1</sup>, Lu Wang <sup>1</sup>, Ming Luo <sup>1</sup>, Yi Peng <sup>1</sup>, Qiwen Zhou <sup>1,2\*</sup>

#### Table lists:

Table S 1. Physicochemical properties of different soil samples for the assessment of the method feasibility.

Table S 2. Recoveries and RSD of the comparisons between different buffers in soil samples.

Table S 3. Mean recoveries, RSD and ME of the comparison between different clean-up materials in soil samples.

Table S 4. Recovery data for pesticides from different provinces of soil fortified at 5  $\mu\text{g kg}^{-1}$ .

Table S 5. Recovery data for pesticides from different provinces of soil fortified at 50  $\mu\text{g kg}^{-1}$ .

Table S 6. Pesticides residues detected in real soil samples.

Table S 1. Physicochemical properties of different soil samples for the assessment of the method feasibility.

| Samples       | PH  | Organic matter (%) | Sand (%) | Clay (%) |
|---------------|-----|--------------------|----------|----------|
| 1             | 6.7 | 4.2                | 37.6     | 34.2     |
| 2             | 7.1 | 5.0                | 39.1     | 32.8     |
| 3             | 6.8 | 5.3                | 35.1     | 35.1     |
| 4             | 6.8 | 6.1                | 43.2     | 26.8     |
| 5             | 6.7 | 4.7                | 30.5     | 30.1     |
| 6             | 6.5 | 4.9                | 25.3     | 33.9     |
| 7             | 5.3 | 6.9                | 13.6     | 40.0     |
| 8             | 5.7 | 6.0                | 20.4     | 23.4     |
| 9             | 6.2 | 7.1                | 26.5     | 25.8     |
| 10            | 6.7 | 4.7                | 30.2     | 13.5     |
| 11            | 7.4 | 5.3                | 40.1     | 21.3     |
| 12            | 7.0 | 5.1                | 35.5     | 22.5     |
| 13            | 6.9 | 4.9                | 29.8     | 24.8     |
| 14            | 7.1 | 4.2                | 37.5     | 23.6     |
| 15            | 7.3 | 5.1                | 25.2     | 29.1     |
| 16            | 6.3 | 5.6                | 28.6     | 39.5     |
| Black sample* | 7.3 | 4.4                | 24.1     | 27.2     |

\*Properties of soil used in method development.

Table S 2. Recoveries and RSD of the comparisons between different buffers in soil samples.

| Pesticides        | No buffer |      | AOAC |      | EN   |      |
|-------------------|-----------|------|------|------|------|------|
|                   | Mean      | %RSD | Mean | %RSD | Mean | %RSD |
| Dichlorvos        | 48        | 5    | 72   | 19   | 67   | 6    |
| Isoprocarb        | 89        | 1    | 109  | 2    | 102  | 1    |
| Atrazine-desethyl | 93        | 2    | 111  | 3    | 106  | 2    |
| Phorate           | 74        | 6    | 96   | 1    | 92   | 3    |
| HCH-alpha         | 81        | 3    | 97   | 4    | 91   | 2    |
| Atrazine          | 96        | 1    | 109  | 4    | 101  | 2    |
| HCH-beta          | 80        | 1    | 102  | 1    | 94   | 3    |
| HCH-gamma         | 79        | 1    | 101  | 1    | 95   | 2    |
| Quintozene        | 59        | 8    | 92   | 10   | 82   | 6    |
| Terbufos          | 63        | 3    | 101  | 1    | 98   | 2    |
| Pyrimethanil      | 80        | 4    | 104  | 6    | 95   | 6    |
| HCH-delta         | 75        | 3    | 103  | 3    | 92   | 2    |
| Chlorothalonil    | 63        | 3    | 84   | 17   | 73   | 3    |
| Acetochlor        | 101       | 5    | 105  | 1    | 99   | 2    |
| Parathion-methyl  | 86        | 6    | 106  | 6    | 107  | 4    |
| Alachlor          | 94        | 5    | 110  | 3    | 103  | 1    |
| Phorate-sulfoxide | 92        | 8    | 97   | 4    | 80   | 1    |
| Malathion         | 84        | 4    | 110  | 7    | 108  | 1    |
| Phorate-sulfone   | 97        | 2    | 117  | 5.6  | 109  | 1    |
| Chlorpyrifos      | 68        | 9    | 101  | 4.9  | 95   | 3    |
| Parathion         | 77        | 8    | 111  | 13   | 110  | 3    |
| Dicofol           | 68        | 6    | 102  | 8    | 101  | 2    |
| Triadimefon       | 96        | 8    | 114  | 5    | 110  | 2    |
| Isocarbophos      | 97        | 5    | 121  | 12   | 123  | 3    |
| Pendimethalin     | 71        | 4    | 114  | 12   | 113  | 4    |
| Fipronil Sulfide  | 73        | 5    | 119  | 9    | 121  | 2    |
| Fipronil          | 84        | 15   | 121  | 6    | 121  | 5    |
| Procymidone       | 87        | 15   | 107  | 16   | 100  | 1    |
| o,p'-DDE          | 62        | 10   | 95   | 2    | 88   | 4    |
| Paclobutrazol     | 83        | 8    | 121  | 6    | 117  | 7    |

|                      |    |     |     |     |     |    |
|----------------------|----|-----|-----|-----|-----|----|
| Endosulfan- $\alpha$ | 65 | 5   | 95  | 8   | 100 | 7  |
| Butachlor            | 71 | 6   | 110 | 6   | 106 | 2  |
| Hexaconazole         | 78 | 6   | 104 | 2   | 104 | 4  |
| Isoprothiolane       | 82 | 2   | 108 | 2   | 107 | 2  |
| Profenofos           | 69 | 4.8 | 103 | 3   | 107 | 2  |
| Uniconazole          | 70 | 7   | 120 | 6   | 118 | 6  |
| p,p'-DDE             | 61 | 8   | 97  | 2   | 89  | 3  |
| Buprofezin           | 78 | 14  | 103 | 1   | 120 | 7  |
| Fipronil Sulfone     | 84 | 7   | 108 | 9   | 115 | 6  |
| Endosulfan- $\beta$  | 71 | 2   | 98  | 7   | 97  | 5  |
| o,p'-DDT             | 62 | 4   | 92  | 5   | 84  | 10 |
| Triazophos           | 79 | 3   | 115 | 8   | 109 | 4  |
| Endosulfan sulfate   | 72 | 1   | 109 | 3   | 102 | 2  |
| p,p'-DDT             | 59 | 8   | 93  | 7   | 79  | 8  |
| Propiconazole        | 76 | 2   | 105 | 2   | 101 | 2  |
| Tebuconazole         | 80 | 3   | 106 | 2   | 111 | 2  |
| Propargite           | 56 | 3   | 117 | 8   | 82  | 3  |
| Epoxiconazole        | 76 | 3   | 110 | 3   | 109 | 3  |
| Iprodione            | 76 | 8   | 119 | 5   | 104 | 15 |
| Bifenthrin           | 73 | 11  | 107 | 5   | 101 | 1  |
| Fenpropathrin        | 58 | 4   | 105 | 3   | 99  | 4  |
| Cyhalothrin          | 61 | 10  | 112 | 3.9 | 115 | 5  |
| Spirodiclofen        | 84 | 5   | 119 | 15  | 108 | 8  |
| Pyridaben            | 78 | 5   | 113 | 10  | 111 | 5  |
| Cyfluthrin           | 79 | 7   | 107 | 11  | 108 | 11 |
| Cypermethrin         | 67 | 12  | 105 | 5   | 101 | 9  |
| Fenvalerate          | 61 | 8   | 110 | 4   | 98  | 3  |
| Difenoconazole       | 73 | 1   | 110 | 5   | 118 | 6  |

---

Table S 3. Mean recoveries, RSD and ME of the comparison between different clean-up materials in soil samples.

| Pesticides        | PSA & C18 |      |     | PSA  |      |     | C18  |      |     |
|-------------------|-----------|------|-----|------|------|-----|------|------|-----|
|                   | Mean      | %RSD | %ME | Mean | %RSD | %ME | Mean | %RSD | %ME |
| Dichlorvos        | 78        | 22   | -24 | 85   | 13   | -14 | 66   | 28   | -22 |
| Isoprocarb        | 88        | 17   | 10  | 102  | 1    | 24  | 94   | 4    | 43  |
| Atrazine-desethyl | 81        | 14   | -5  | 103  | 4    | 29  | 103  | 6    | 20  |
| Phorate           | 85        | 19   | 26  | 83   | 1    | 195 | 71   | 19   | 160 |
| HCH-alpha         | 81        | 15   | -32 | 86   | 2    | -9  | 79   | 10   | -10 |
| Atrazine          | 103       | 5    | -7  | 97   | 4    | 27  | 93   | 1    | 19  |
| HCH-beta          | 97        | 5    | -52 | 94   | 3    | -41 | 96   | 1    | -41 |
| HCH-gamma         | 93        | 2    | -11 | 93   | 1    | 9   | 93   | 4    | 10  |
| Quintozene        | 80        | 5    | -25 | 94   | 18   | 2   | 73   | 8    | 1   |
| Terbufos          | 108       | 5    | -10 | 92   | 5    | 229 | 74   | 12   | 185 |
| Pyrimethanil      | 87        | 12   | 1   | 101  | 6    | 40  | 87   | 4    | 25  |
| HCH-delta         | 95        | 4    | 0   | 91   | 1    | -43 | 85   | 3    | -44 |
| Chlorothalonil    | 81        | 14   | -39 | 76   | 12   | -8  | 72   | 4    | 6   |
| Acetochlor        | 86        | 7    | 36  | 94   | 1    | 61  | 92   | 7    | 48  |
| Parathion-methyl  | 101       | 8    | 8   | 105  | 8    | 123 | 91   | 8    | 110 |
| Alachlor          | 96        | 8    | 21  | 96   | 1    | 27  | 94   | 4    | 18  |
| Phorate-sulfoxide | 99        | 3    | 69  | 98   | 4    | 81  | 100  | 6    | 71  |
| Malathion         | 99        | 6    | 106 | 102  | 8    | 147 | 97   | 6    | 118 |
| Phorate-sulfone   | 103       | 3    | -10 | 107  | 4    | 0   | 100  | 4    | -5  |
| Chlorpyrifos      | 94        | 4    | 31  | 95   | 1    | 39  | 97   | 4    | 32  |
| Parathion         | 97        | 7    | 15  | 106  | 4    | 76  | 91   | 8    | 62  |
| Dicofol           | 86        | 5    | 12  | 126  | 21   | 19  | 105  | 3    | -11 |
| Triadimefon       | 109       | 8    | 33  | 103  | 1    | 50  | 98   | 10   | 37  |
| Isocarbophos      | 118       | 12   | 154 | 108  | 7    | 367 | 99   | 3    | 278 |
| Pendimethalin     | 101       | 11   | 9   | 105  | 3    | 55  | 78   | 3    | 45  |
| Fipronil Sulfide  | 106       | 3    | 16  | 104  | 5    | 39  | 99   | 4    | 27  |
| Fipronil          | 118       | 7    | 9   | 116  | 10   | 94  | 100  | 13   | 61  |
| Procymidone       | 82        | 5    | -8  | 104  | 4    | 4   | 89   | 3    | -7  |
| o,p'-DDE          | 84        | 3    | -6  | 88   | 2    | -1  | 82   | 4    | -6  |
| Paclobutrazol     | 119       | 6    | 136 | 113  | 7    | 247 | 104  | 4    | 174 |

|                      |     |    |     |     |    |     |     |    |     |
|----------------------|-----|----|-----|-----|----|-----|-----|----|-----|
| Endosulfan- $\alpha$ | 87  | 10 | -2  | 108 | 18 | -2  | 87  | 11 | -8  |
| Butachlor            | 99  | 7  | 43  | 100 | 7  | 107 | 90  | 4  | 82  |
| Hexaconazole         | 104 | 5  | 21  | 126 | 18 | 180 | 79  | 10 | 141 |
| Isoprothiolane       | 99  | 6  | 86  | 92  | 3  | 234 | 95  | 5  | 162 |
| Profenofos           | 106 | 2  | 27  | 94  | 7  | 321 | 91  | 1  | 218 |
| Uniconazole          | 100 | 10 | 77  | 103 | 10 | 251 | 89  | 1  | 189 |
| p,p'-DDE             | 87  | 3  | -9  | 89  | 3  | -5  | 85  | 5  | -9  |
| Buprofezin           | 100 | 13 | 54  | 109 | 9  | 164 | 91  | 12 | 129 |
| Fipronil Sulfone     | 115 | 10 | 30  | 122 | 10 | 72  | 110 | 12 | 40  |
| Endosulfan- $\beta$  | 97  | 7  | -2  | 86  | 9  | 1   | 80  | 8  | 1   |
| o,p'-DDT             | 91  | 4  | 2   | 82  | 8  | 16  | 85  | 2  | 0   |
| Triazophos           | 113 | 14 | 56  | 111 | 7  | 103 | 96  | 7  | 77  |
| Endosulfan sulfate   | 91  | 12 | 26  | 99  | 5  | 42  | 98  | 4  | 33  |
| p,p'-DDT             | 84  | 13 | 15  | 75  | 15 | 34  | 75  | 3  | 22  |
| Propiconazole        | 89  | 3  | 128 | 99  | 2  | 249 | 99  | 2  | 189 |
| Tebuconazole         | 84  | 22 | 91  | 93  | 3  | 393 | 98  | 3  | 286 |
| Propargite           | 100 | 9  | 179 | 97  | 13 | 426 | 103 | 6  | 420 |
| Epoxiconazole        | 102 | 14 | 115 | 115 | 5  | 311 | 94  | 4  | 243 |
| Iprodione            | 97  | 13 | 16  | 82  | 13 | 262 | 96  | 7  | 269 |
| Bifenthrin           | 88  | 12 | 198 | 96  | 3  | 141 | 89  | 3  | 103 |
| Fenpropathrin        | 83  | 11 | 30  | 97  | 12 | 118 | 87  | 3  | 89  |
| Cyhalothrin          | 119 | 12 | 57  | 113 | 6  | 230 | 122 | 17 | 178 |
| Spirodiclofen        | 110 | 9  | 26  | 97  | 16 | 179 | 80  | 14 | 153 |
| Pyridaben            | 104 | 6  | 198 | 99  | 8  | 321 | 93  | 6  | 242 |
| Cyfluthrin           | 94  | 17 | 3   | 122 | 9  | 146 | 92  | 15 | 154 |
| Cypermethrin         | 110 | 13 | 14  | 96  | 6  | 216 | 114 | 3  | 199 |
| Fenvalerate          | 104 | 13 | 41  | 107 | 4  | 263 | 100 | 4  | 187 |
| Difenoconazole       | 111 | 7  | 16  | 123 | 17 | 222 | 119 | 24 | 162 |

Table S 4. Recovery data for pesticides from different provinces of soil fortified at 5  $\mu\text{g kg}^{-1}$ .

| Pesticides           | Shandong |      | Jiangsu |      | Liaoning |      |
|----------------------|----------|------|---------|------|----------|------|
|                      | Mean     | %RSD | Mean    | %RSD | Mean     | %RSD |
| Dichlorvos           | 68       | 7    | 67      | 17   | 60       | 11   |
| Isoproc carb         | 92       | 5    | 97      | 11   | 90       | 10   |
| Atrazine-desethyl    | 91       | 4    | 97      | 1    | 87       | 4    |
| Phorate              | 62       | 9    | 61      | 19   | 64       | 10   |
| HCH-alpha            | 63       | 6    | 67      | 19   | 70       | 7    |
| Atrazine             | 72       | 3    | 106     | 13   | 103      | 2    |
| HCH-beta             | 83       | 4    | 82      | 5    | 102      | 3    |
| HCH-gamma            | 71       | 2    | 73      | 16   | 79       | 8    |
| Quintozene           | 49       | 10   | 60      | 13   | 118      | 16   |
| Terbufos             | 66       | 6    | 66      | 8    | 70       | 8    |
| Pyrimethanil         | 94       | 9    | 101     | 7    | 79       | 11   |
| HCH-delta            | 85       | 5    | 87      | 3    | 92       | 4    |
| Chlorothalonil       | 81       | 16   | 107     | 14   | 119      | 3    |
| Acetochlor           | 70       | 4    | 74      | 4    | 91       | 3    |
| Parathion-methyl     | 93       | 4    | 100     | 6    | 91       | 5    |
| Alachlor             | 90       | 1    | 96      | 5    | 92       | 1    |
| Phorate-sulfoxide    | 94       | 10   | 102     | 5    | 99       | 7    |
| Malathion            | 86       | 6    | 92      | 6    | 87       | 4    |
| Phorate-sulfone      | 87       | 2    | 85      | 15   | 86       | 4    |
| Chlorpyrifos         | 83       | 5    | 82      | 4    | 91       | 3    |
| Parathion            | 75       | 3    | 69      | 14   | 79       | 16   |
| Dicofol              | 56       | 4    | 55      | 6    | 56       | 4    |
| Triadimefon          | 88       | 2    | 99      | 1    | 92       | 6    |
| Isocarbophos         | 96       | 4    | 111     | 11   | 98       | 9    |
| Pendimethalin        | 88       | 7    | 71      | 5    | 79       | 19   |
| Fipronil Sulfide     | 97       | 3    | 107     | 7    | 93       | 2    |
| Fipronil             | 113      | 1    | 116     | 10   | 117      | 3    |
| Procymidone          | 117      | 20   | 118     | 13   | 85       | 23   |
| o,p'-DDE             | 77       | 3    | 71      | 8    | 88       | 2    |
| Paclobutrazol        | 65       | 1    | 65      | 1    | 65       | 1    |
| Endosulfan- $\alpha$ | 99       | 11   | 89      | 8    | 105      | 12   |

|                     |     |    |     |    |     |    |
|---------------------|-----|----|-----|----|-----|----|
| Butachlor           | 89  | 6  | 100 | 16 | 95  | 5  |
| Hexaconazole        | 90  | 4  | 110 | 10 | 95  | 14 |
| Isoprothiolane      | 94  | 4  | 117 | 5  | 105 | 8  |
| Profenofos          | 106 | 8  | 108 | 6  | 113 | 8  |
| Uniconazole         | 94  | 8  | 103 | 9  | 90  | 6  |
| p,p'-DDE            | 63  | 6  | 64  | 15 | 91  | 10 |
| Buprofezin          | 110 | 10 | 114 | 16 | 110 | 12 |
| Fipronil Sulfone    | 126 | 2  | 125 | 20 | 125 | 17 |
| Endosulfan- $\beta$ | 100 | 8  | 89  | 6  | 110 | 13 |
| o,p'-DDT            | 94  | 3  | 110 | 13 | 104 | 3  |
| Triazophos          | 89  | 7  | 101 | 13 | 96  | 9  |
| Endosulfan sulfate  | 92  | 7  | 91  | 6  | 97  | 4  |
| p,p'-DDT            | 64  | 10 | 62  | 5  | 69  | 9  |
| Propiconazole       | 95  | 3  | 98  | 9  | 97  | 10 |
| Tebuconazole        | 77  | 5  | 115 | 3  | 73  | 8  |
| Propargite          | 81  | 17 | 99  | 15 | 90  | 5  |
| Epoxiconazole       | 78  | 5  | 90  | 3  | 85  | 10 |
| Iprodione           | 114 | 16 | 110 | 12 | 100 | 17 |
| Bifenthrin          | 85  | 5  | 85  | 8  | 94  | 4  |
| Fenpropathrin       | 91  | 14 | 76  | 12 | 80  | 9  |
| Cyhalothrin         | 78  | 5  | 82  | 8  | 85  | 6  |
| Spirodiclofen       | 85  | 17 | 107 | 5  | 87  | 20 |
| Pyridaben           | 80  | 8  | 82  | 9  | 103 | 2  |
| Cyfluthrin          | 114 | 18 | 112 | 16 | 114 | 2  |
| Cypermethrin        | 117 | 2  | 96  | 10 | 111 | 10 |
| Fenvalerate         | 106 | 13 | 105 | 16 | 119 | 12 |
| Difenoconazole      | 127 | 3  | 123 | 4  | 130 | 10 |

---

Table S 5. Recovery data for pesticides from different provinces of soil fortified at 50  $\mu\text{g kg}^{-1}$ .

| Pesticides           | Shandong |      | Jiangsu |      | Liaoning |      |
|----------------------|----------|------|---------|------|----------|------|
|                      | Mean     | %RSD | Mean    | %RSD | Mean     | %RSD |
| Dichlorvos           | 61       | 17   | 66      | 10   | 69       | 8    |
| Isoprocarb           | 79       | 5    | 82      | 4    | 87       | 8    |
| Atrazine-desethyl    | 89       | 2    | 91      | 3    | 90       | 3    |
| Phorate              | 90       | 8    | 100     | 5    | 98       | 24   |
| HCH-alpha            | 84       | 12   | 76      | 4    | 78       | 11   |
| Atrazine             | 85       | 2    | 88      | 1    | 88       | 1    |
| HCH-beta             | 77       | 3    | 80      | 2    | 89       | 3    |
| HCH-gamma            | 84       | 9    | 75      | 8    | 80       | 5    |
| Quintozene           | 86       | 5    | 88      | 8    | 79       | 16   |
| Terbufos             | 84       | 6    | 73      | 7    | 83       | 20   |
| Pyrimethanil         | 76       | 3    | 78      | 5    | 78       | 8    |
| HCH-delta            | 76       | 3    | 79      | 2    | 86       | 6    |
| Chlorothalonil       | 76       | 9    | 68      | 10   | 111      | 8    |
| Acetochlor           | 77       | 2    | 80      | 1    | 86       | 4    |
| Parathion-methyl     | 68       | 3    | 74      | 6    | 78       | 10   |
| Alachlor             | 81       | 2    | 84      | 2    | 86       | 2    |
| Phorate-sulfoxide    | 75       | 4    | 77      | 1    | 76       | 9    |
| Malathion            | 72       | 5    | 74      | 3    | 80       | 11   |
| Phorate-sulfone      | 65       | 8    | 69      | 3    | 85       | 5    |
| Chlorpyrifos         | 72       | 11   | 672     | 2    | 81       | 4    |
| Parathion            | 79       | 4    | 75      | 2    | 74       | 12   |
| Dicofol              | 70       | 18   | 68      | 2    | 67       | 36   |
| Triadimefon          | 87       | 2    | 88      | 1    | 88       | 3    |
| Isocarbophos         | 71       | 12   | 75      | 3    | 75       | 13   |
| Pendimethalin        | 75       | 7    | 77      | 4    | 77       | 9    |
| Fipronil Sulfide     | 94       | 5    | 95      | 2    | 97       | 5    |
| Fipronil             | 120      | 8    | 120     | 1    | 117      | 7    |
| Procymidone          | 90       | 1    | 88      | 7    | 92       | 3    |
| o,p'-DDE             | 78       | 4    | 75      | 1    | 85       | 2    |
| Paclobutrazol        | 87       | 2    | 87      | 2    | 95       | 4    |
| Endosulfan- $\alpha$ | 72       | 9    | 73      | 2    | 81       | 5    |



|                     |     |    |     |    |     |    |
|---------------------|-----|----|-----|----|-----|----|
| Butachlor           | 82  | 6  | 77  | 3  | 79  | 8  |
| Hexaconazole        | 76  | 4  | 78  | 2  | 81  | 9  |
| Isoprothiolane      | 77  | 6  | 77  | 3  | 81  | 11 |
| Profenofos          | 81  | 11 | 76  | 8  | 76  | 19 |
| Uniconazole         | 77  | 7  | 78  | 6  | 77  | 10 |
| p,p'-DDE            | 74  | 3  | 78  | 5  | 83  | 2  |
| Buprofezin          | 74  | 5  | 81  | 1  | 78  | 7  |
| Fipronil Sulfone    | 119 | 5  | 128 | 2  | 119 | 6  |
| Endosulfan- $\beta$ | 77  | 5  | 77  | 3  | 94  | 1  |
| o,p'-DDT            | 84  | 4  | 98  | 2  | 122 | 2  |
| Triazophos          | 78  | 11 | 79  | 4  | 72  | 18 |
| Endosulfan sulfate  | 79  | 4  | 81  | 1  | 86  | 6  |
| p,p'-DDT            | 78  | 3  | 79  | 14 | 88  | 12 |
| Propiconazole       | 92  | 2  | 91  | 8  | 87  | 5  |
| Tebuconazole        | 85  | 6  | 86  | 3  | 83  | 9  |
| Propargite          | 88  | 8  | 72  | 2  | 78  | 11 |
| Epoxiconazole       | 74  | 8  | 79  | 3  | 82  | 12 |
| Iprodione           | 121 | 14 | 119 | 13 | 103 | 26 |
| Bifenthrin          | 83  | 7  | 78  | 3  | 83  | 4  |
| Fenpropathrin       | 82  | 15 | 76  | 6  | 81  | 5  |
| Cyhalothrin         | 70  | 10 | 72  | 2  | 89  | 5  |
| Spirodiclofen       | 86  | 18 | 83  | 2  | 78  | 1  |
| Pyridaben           | 71  | 13 | 84  | 4  | 108 | 9  |
| Cyfluthrin          | 89  | 20 | 83  | 4  | 90  | 16 |
| Cypermethrin        | 78  | 10 | 85  | 7  | 101 | 2  |
| Fenvalerate         | 91  | 18 | 101 | 15 | 114 | 12 |
| Difenoconazole      | 124 | 1  | 123 | 12 | 117 | 6  |

---

Table S 6. Pesticides residues detected in real soil samples ( $\mu\text{g kg}^{-1}$ ).

| Pesticides          | Sample 1 |      | Sample 2 |      | Sample 3 |      | Sample 4 |      | Sample 5 |      | Sample 6 |      | Sample 7 |      | Sample 8 |     |     |
|---------------------|----------|------|----------|------|----------|------|----------|------|----------|------|----------|------|----------|------|----------|-----|-----|
|                     | Q        | S    | Q        | S    | Q        | S    | Q        | S    | Q        | S    | Q        | S    | Q        | S    | Q        | S   |     |
| Isoprocarb          |          |      |          |      |          | 0.51 |          |      |          |      |          |      |          |      |          |     |     |
| Atrazine            | 0.26     |      | 0.40     | 0.62 | 0.52     | 0.50 |          |      | 2.5      | 3.2  | 2.6      | 2.7  | 1.0      |      |          |     | 2.8 |
| HCH-beta            |          |      |          |      |          |      |          |      | 7.1      | 11.0 |          |      |          |      |          |     |     |
| Terbufos            |          |      | 3.6      |      |          |      |          |      |          |      |          |      |          |      |          |     |     |
| Acetochlor          | 1.9      | 2.2  | 2.0      | 0.70 | 2.0      | 0.44 |          |      | 2.2      | 2.6  | 3.8      | 1.1  | 1.9      | 0.53 | 2.0      | 1.1 |     |
| Phorate Sulfone     | 12       | 13   |          |      |          |      |          |      |          |      |          |      |          |      |          |     |     |
| Chlorpyrifos        | 25       | 23   | 4.0      | 2.3  | 4.2      | 2.6  |          |      |          |      |          | 0.56 |          |      |          |     |     |
| Dicofol             |          |      |          |      |          |      |          |      | 4.4      | 4.0  | 5.0      |      |          |      |          |     |     |
| Pendimethalin       | 3.9      | 1.4  | 4.3      | 0.5  |          |      | 4.2      | 0.73 | 11       | 20   |          |      |          |      |          |     |     |
| Procymidone         |          |      |          | 4.7  | 16       | 14   |          |      |          |      |          |      |          |      |          |     |     |
| o,p'-DDE            |          |      |          |      |          |      |          |      | 3.1      | 3.2  | 2.2      |      |          |      |          |     |     |
| p,p'-DDE            | 0.72     | 0.71 | 0.74     | 1.3  | 0.62     | 0.70 | 1.1      | 1.2  | 99       | 76   | 1.3      | 1.4  | 4.6      | 5.3  | 0.64     | 1.8 |     |
| Endosulfan- $\beta$ | 3.4      | 2.7  |          |      |          |      |          |      |          |      |          |      |          |      |          |     |     |
| o,p'-DDT            |          |      |          |      |          |      |          |      | 11       | 16   | 5.0      |      | 3.7      | 3.7  |          |     |     |
| Endosulfan sulfate  | 4.2      | 3.0  |          |      | 2.6      |      | 2.7      |      |          |      | 2.7      |      |          |      |          |     |     |
| p,p'-DDT            |          |      |          |      |          |      |          |      | 32       | 15   |          |      |          |      |          |     |     |
| Tebuconazole        |          |      |          |      |          |      |          |      | 5.8      | 4.3  | 5.5      |      |          |      |          |     |     |
| Cyhalothrin         | 41       |      | 4.3      |      |          |      |          |      | 4.6      |      | 4.6      |      |          |      |          | 21  |     |

Pyridaben 4.8

Difenoconazole 5.0 5.0 5.0

Table S 6. Pesticides residues detected in real soil samples ( $\mu\text{g kg}^{-1}$ ). (cotinued)

| Pesticides       | Sample 9 |      | Sample 10 |     | Sample 11 |     | Sample 12 |     | Sample 13         |                   | Sample 14         |                   | Sample 15 |     | Sample 16 |     |
|------------------|----------|------|-----------|-----|-----------|-----|-----------|-----|-------------------|-------------------|-------------------|-------------------|-----------|-----|-----------|-----|
|                  | Q        | S    | Q         | S   | Q         | S   | Q         | S   | Q                 | S                 | Q                 | S                 | Q         | S   | Q         | S   |
| phorate          |          |      |           |     |           |     |           |     | 2.3               | 5.2               |                   |                   |           |     |           |     |
| HCH-alpha        |          | 0.11 |           |     |           |     |           |     |                   |                   | 1.6               | 1.3               |           |     |           |     |
| Atrazine         |          | 1.3  |           |     |           |     |           |     |                   |                   |                   |                   | 0.71      |     | 3.6       | 2.6 |
| HCH-beta         | 2.2      |      | 2.3       | 1.8 | 2.1       | 1.3 | 3.6       | 2.5 | 4.0               | 3.8               | 6.6               | 4.6               | 2.6       | 2.2 | 2.3       |     |
| PCNB             |          |      |           |     |           |     |           |     | $4.1 \times 10^2$ | $4.2 \times 10^2$ | 9.7               | 11                |           |     |           |     |
| pyrimethanil     |          |      |           |     | 27        | 29  | 4.2       | 3.0 | 21                | 19                | 8.8               | 11                |           |     |           |     |
| HCH-delta        |          |      |           |     |           |     |           |     |                   |                   | 2.7               | 1.8               |           |     |           |     |
| Acetochlor       | 5.2      | 6.4  | 4.7       | 4.0 | 1.9       | 2.6 | 1.8       | 2.6 |                   |                   | 1.9               | 1.4               | 2.8       | 2.2 | 2.1       | 1.3 |
| Phorate Sulfone  | 5.1      | 12   |           |     |           |     |           |     | 28                | 26                | $1.4 \times 10^2$ | $1.3 \times 10^2$ |           |     |           |     |
| Chlorpyrifos     | 12       | 15   |           |     |           |     |           |     | 43                | 44                | $2.6 \times 10^2$ | $2.5 \times 10^2$ |           |     |           |     |
| Parathion        |          |      |           |     |           |     |           |     |                   |                   | 4.1               | 4.6               |           |     |           |     |
| Dicofol          |          |      | 3.8       | 3.0 | 3.9       | 3.7 | 4.8       | 4.5 |                   |                   | 3.7               | 1.5               | 3.7       |     | 3.7       |     |
| Pendimethalin    |          |      | 7.9       | 7.0 |           |     | 4.3       | 2.1 |                   |                   | 6.8               | 5.6               | 3.9       | 3.1 |           |     |
| Fipronil Sulfide |          |      |           |     |           |     |           |     |                   |                   | 6.0               | 6.0               |           |     |           |     |
| Fipronil         |          |      |           |     |           |     |           |     |                   |                   | 9.0               | 9.6               |           |     |           |     |
| Procymidone      |          |      |           |     | 27        | 21  | 26        | 21  | 56                | 52                | 17                | 16                |           |     |           |     |

|                      |     |     |     |     |     |     |     |     |                   |                   |                   |                   |     |     |     |     |
|----------------------|-----|-----|-----|-----|-----|-----|-----|-----|-------------------|-------------------|-------------------|-------------------|-----|-----|-----|-----|
| o,p'-DDE             | 2.1 |     | 2.0 | 2.8 | 2.1 | 2.8 | 2.4 | 3.1 | 2.0               |                   | 2.0               |                   |     |     |     |     |
| Paclobutrazol        |     |     |     |     | 3.5 | 3.4 | 3.0 | 2.0 |                   |                   | 3.0               | 1.3               |     |     |     |     |
| Endosulfan- $\alpha$ |     |     |     |     |     |     |     |     | 5.0               | 6.6               | 4.3               | 4.4               |     |     |     |     |
| Hexaconazole         | 5.5 |     | 36  |     |     |     |     |     |                   |                   |                   |                   |     |     |     |     |
| Profenofos           |     |     |     |     | 54  | 58  | 4.5 | 4.7 |                   |                   |                   |                   |     |     |     |     |
| p,p'-DDE             | 3.7 | 6.8 | 10  | 20  | 13  | 19  | 37  | 51  | 2.5               | 3.0               | 2.7               | 4.7               | 1.1 | 4.0 | 1.7 | 3.4 |
| Fipronil Sulfone     |     |     |     |     |     |     |     |     |                   |                   | 5.0               | 1.8               |     |     |     |     |
| Endosulfan- $\beta$  |     |     |     |     |     |     |     |     | 80                | 77                | 36                | 40                |     |     |     |     |
| o,p'-DDT             | 4.3 | 5.9 | 5.2 | 6.7 | 3.2 | 6.0 | 30  | 43  | 3.0               | 1.1               | 3.0               | 2.4               | 3.0 | 1.3 | 4.2 | 2.0 |
| Endosulfan sulfate   |     |     |     |     | 22  | 21  |     |     | $2.8 \times 10^2$ | $2.7 \times 10^2$ | $1.3 \times 10^2$ | $1.5 \times 10^2$ | 2.7 | 1.4 | 2.7 | 1.3 |
| p,p'-DDT             | 3.4 | 3.6 | 3.7 | 5.3 | 4.3 | 5.4 | 27  | 25  | 3.0               | 2.3               | 3.8               | 2.7               |     |     | 3.5 | 2.1 |
| Propiconazole        |     |     |     |     | 4.9 | 7.6 | 6.0 | 14  | 4.7               | 4.2               | 14                | 13                |     |     |     |     |
| Tebuconazole         | 5.2 |     |     |     |     |     |     |     | 21                | 18                | 28                | 26                |     |     |     |     |
| Bifenthrin           |     |     |     |     | 4.0 | 1.0 |     |     | 16                | 16                | 5.0               | 5.0               |     |     | 4.0 |     |
| Cyhalothrin          |     |     |     |     | 4.6 |     |     |     | 4.6               | 2.7               | 11                | 10                |     |     |     |     |
| Pyridaben            |     |     |     |     |     |     | 6.7 |     | 21                | 9.7               | 48                | 42                | 6.6 | 8.0 | 8.5 | 14  |
| Fenvalerate          |     |     |     |     | 5.0 | 6.1 | 5.0 | 4.0 |                   |                   |                   |                   |     |     |     |     |
| Difenoconazole       |     |     |     |     | 33  | 23  | 12  | 11  | 40                | 26                | 56                | 53                |     |     |     |     |

Blank regions were not detected.

Q:QuEChE S:shacking.
